# Supplementary material for: Aguilar Moré: experiencias de un mundo entre sueño y realidad
Source: Royal Society of Chemistry journal article supplement (doi:10.1039/c3dt53334d), 2006-01-01
Supplement: c3dt53334d.pdf [file c3dt53334d.pdf]

## Electronic Supplementary Information (ESI) for Dalton Transactions

# Neutral Copper(I) Dipyrrin Complexes and their use as Dye Sensitizers in Dye-Sensitized Solar Cells

Tracy E. Hewat, Lesley J. Yellowlees, and Neil Robertson \*

*School of Chemistry and EaStChem, University of Edinburgh,*

*King's Buildings, Edinburgh, UK.*

*Fax: +44 131 650 4743; Tel: +44 131 650 4755;*

*E-mail: neil.robertson@ed.ac.uk*

## Experimental

### Synthesis of 4,4'-(CO<sub>2</sub>Et)-6,6'-dimethyl-2,2'-bipyridine (dmdecbpy)

Dmdecbpy (400 mg, 1.47 mmol) and conc. sulfuric acid (7.8 mL) were added to ethanol (86 mL) and refluxed under nitrogen for 72 h. The solution was cooled down, poured over crushed ice and was kept in the fridge overnight. The solvent was reduced to half the volume under reduced pressure. 1M NaOH was added until a precipitate formed, ensuring the solution was kept at pH 1. The white solid was filtered off and washed with water. Yield: 56 %, 273 mg. <sup>1</sup>H NMR (DMSO, 400 MHz): δ 8.61 (s, 2H, H-bpy), 7.79 (s, 2H, H-bpy), 4.41 (q, 4H, O-CH<sub>2</sub>, J<sub>HH</sub> = 7.2 Hz), 2.67 (s, 6H, CH<sub>3</sub>), 1.36 (t, 6H, CH<sub>2</sub>CH<sub>3</sub>, J<sub>HH</sub> = 7.1 Hz). +ESI/MS: *m/z* 329.2 (M<sup>+</sup>). Anal. Calc. for C<sub>18</sub>H<sub>20</sub>N<sub>2</sub>O<sub>4</sub>: C 65.84, H 6.14, N 8.53. Found: C 65.71, H 6.10, N 8.68.

### Step 1 of HL3 synthesis (4-(Ethoxy)-1,1,1-trifluoro-3-butene-2-one)

4-dimethylaminopyridine (12 mg, 0.1 mmol), and trifluoroacetic anhydride (328 mg, 15.62 mmol) were added to DCM (20 mL) and cooled to -10 °C. Ethyl vinyl ether (106 mg, 14.7 mmol) was added dropwise to the solution. The reaction mixture was stirred at 0 °C for 19 h. The solution was warmed to room temperature and the solvent was removed under reduced pressure. The purple oil was poured into sodium bicarbonate solution to produce a yellow oil. The phases were extracted and separated and the organic layer was dried over anhydrous Na<sub>2</sub>SO<sub>4</sub>. The solvent was removed under reduced pressure to yield a red/orange oil. Yield: 267 mg, 10.8 %. <sup>1</sup>H NMR (CDCl<sub>3</sub>, 400 MHz): δ 7.89 (d, 1H, J = 12.1 Hz, CH), 5.85 (d, 1H, J = 12.2 Hz, CH), 4.10 (q, 2H, J = 7, 14.3 Hz, CH<sub>2</sub>), 1.40 (t, 3H, J = 6.9, 14.3 Hz, CH<sub>3</sub>).

### Step 2 of HL3 synthesis (1-[2-hydroxy-4-(trifluoromethyl)phenyl]ethanone)

NaH (240 mg, 10 mmol) was placed under argon and cooled down to 0 °C. Dry THF (10 mL) was added to NaH via cannula. 4-(Ethoxy)-1,1,1-trifluoro-3-butene-2-one (840 mg, 5 mmol) and acetylacetone (500 mg, 5 mmol) were transferred to the reaction mixture slowly. The mixture was warmed to room temperature and then refluxed for 3 h. The solution turned from yellow to red. The mixture was cooled to room temperature. 1M HCl was added until the solution reached pH 3. The mixture was separated and extracted with DCM (3x40 mL) and the organic layer was dried over MgSO<sub>4</sub>. The solvent was removed under reduced pressure to yield a yellow/brown oil. The sample was purified on silica (hexane/ethyl acetate 90:10) to yield a yellow oil. Yield: 195 mg, 10.5 %. <sup>1</sup>H NMR (CDCl<sub>3</sub>, 400 MHz): δ 12.28 (s, 1H, OH), 7.86 (d, 1H, J = 8.3 Hz, ar), 7.25 (d, 1H, J = 1.8 Hz, ar), 7.15 (dd, 1H, J = 1.8, 8.2 Hz, ar), 2.68 (s, 3H, CH<sub>3</sub>).

### Step 3 of HL3 synthesis

Benzhydrazide (130 mg, 9.5 mmol) and 1-[2-hydroxy-4-(trifluoromethyl)phenyl]ethanone (195 mg, 9.5 mmol) were added to *n*-propanol and refluxed overnight. The reaction mixture was cooled to room temperature and filtered. The crude product was recrystallised from boiling *n*-propanol to yield a white crystalline product. Yield: 159 mg, 51.7 %. <sup>1</sup>H NMR (DMSO, 500 MHz): δ 13.77 (s, 1H, NH), 11.50 (s, 1H, OH), 7.95 (d, 2H, J = 7.6 Hz, Ph), 7.86 (d, 1H, J = 7.6 Hz, ar), 7.64 (t, 1H, J = 7.6 Hz, Ph), 7.56 (t, 2H, J = 7.6 Hz, Ph), 7.22 (d, 1H, J = 7.6 Hz, ar), 7.22 (s, 1H, ar), 2.53 (s, 3H, CH<sub>3</sub>). <sup>13</sup>C NMR (DMSO, 128.1 MHz): δ 164.7, 158.8, 156.4, 132.7, 132.1, 129.7, 128.4, 128.2, 122.9, 122.7, 114.6, 113.9, 14.2. +ESI/MS: 323.11 [M+H]. C<sub>16</sub>H<sub>13</sub>F<sub>3</sub>N<sub>2</sub>O<sub>2</sub>: C 59.63 H 4.07 N 8.69. Found C 59.76 H 3.85 N 8.78.

### Step 4 of HL3 synthesis

The product from step 3 was added to THF at 25 °C. Lead(IV) acetate was added slowly to the solution. The reaction mixture was stirred for 1 h then filtered. The filtrate was separated and extracted with DCM, water, and then brine. The organic extracts were dried over MgSO<sub>4</sub>. The solvent was removed under reduced pressure. The crude product was purified on alumina Act(IV) (DCM/cyclohexane 40:60) to yield a white solid. Yield: 859 mg, 86.4 %. <sup>1</sup>H NMR (CDCl<sub>3</sub>, 500 MHz): δ 7.97 (d, 1H, J = 8.3 Hz, ar), 7.86 (dd, 1H, J = 8.3 Hz, ar), 7.74 (dd, 2H, J = 7.8 Hz, Ph), 7.67 (s, 1H, ar), 7.59 (tt, 1H, J = 7.8 Hz, Ph), 7.46 (t, 2H, J = Hz, 7.8 Ph), 2.56 (s, 3H, CH<sub>3</sub>). <sup>19</sup>F NMR (DMSO, 376 MHz): δ -63.10. +ESI/MS: 293.08 [M+H]. C<sub>16</sub>H<sub>11</sub>F<sub>3</sub>O<sub>2</sub>: C 65.76 H 3.79 N 0. Found C 65.83 H 3.84 N 0.

### Step 5 of HL3 synthesis

The product from step 4 was added to acetic acid (12.4 mL) and methanol (24.6 mL). Ammonium hydroxide (conc. 6.2 mL) was added dropwise to the solution. The mixture was stirred at room temperature for 24 h. The mixture was filtered and the solid was dissolved in chloroform, and separated and extracted with water (2x30 mL). The organic extracts were dried over MgSO<sub>4</sub> and the solvent was removed under reduced pressure. The crude product was purified on silica (CHCl<sub>3</sub>) to yield a purple solid. Yield: 210 mg, 29.4 %. <sup>1</sup>H NMR (DMSO, 500 MHz): δ 13.86 (s), 12.53 (s), 11.52 (s), 8.60 (d), 8.57 (d), 8.31 (s), 8.16 (d), 8.15 (d), 8.09 (d), 8.07 (s), 7.98 (d), 7.94 (d), 7.83 (s), 7.77 (s), 7.69 (d), 7.67 (t), 7.58 (t), 7.52 (t), 7.50 (s), 7.45 (t), 7.34 (d), 7.29 (t), 6.73 (dd). <sup>19</sup>F NMR (DMSO, 376 MHz): δ -60.07 (2), -60.17 (2), -60.19 (1), -60.26 (1), -60.28 (1), -60.40 (2). +ESI/MS: 532.41 [M<sup>+</sup>]. C<sub>31</sub>H<sub>18</sub>F<sub>6</sub>N<sub>2</sub>: C 69.92 H 3.41 N 5.26. Found C 70.05 H 3.51 N 5.36.

### Reaction Scheme of HL3 ligand

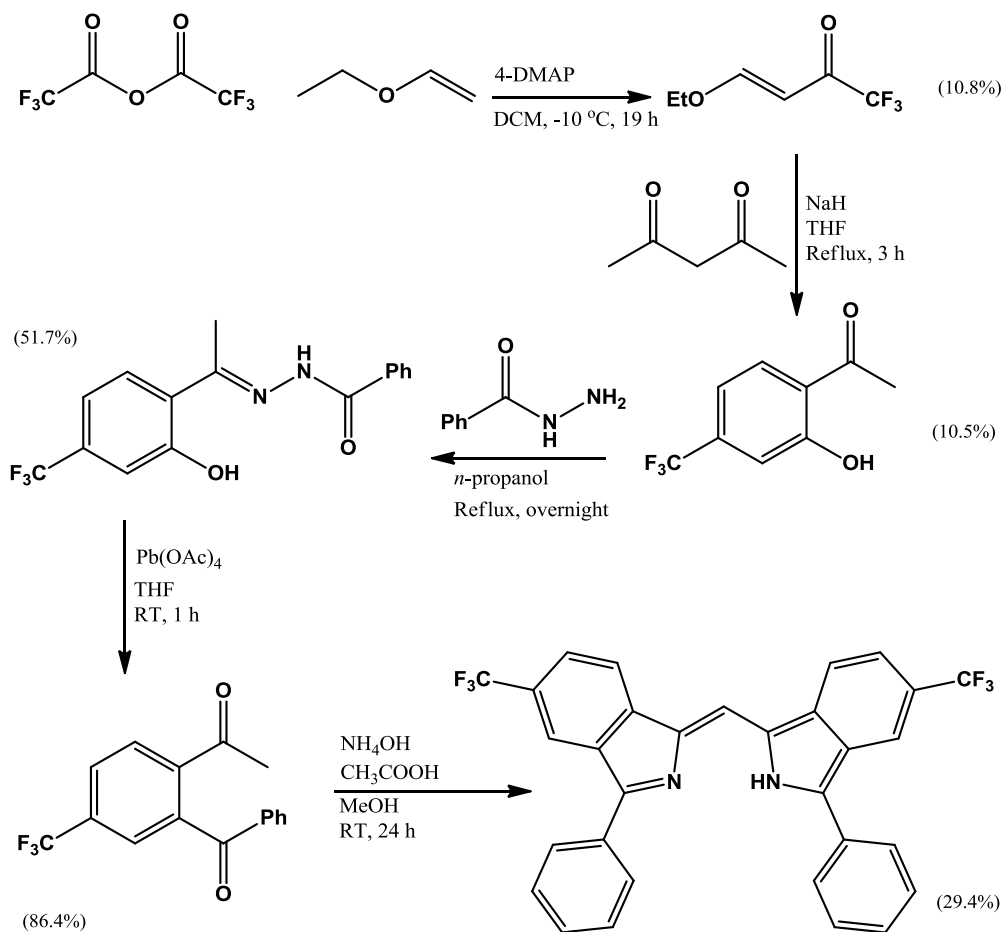

**Figure S1** Reaction scheme for the synthesis of HL3.

## Stability Tests

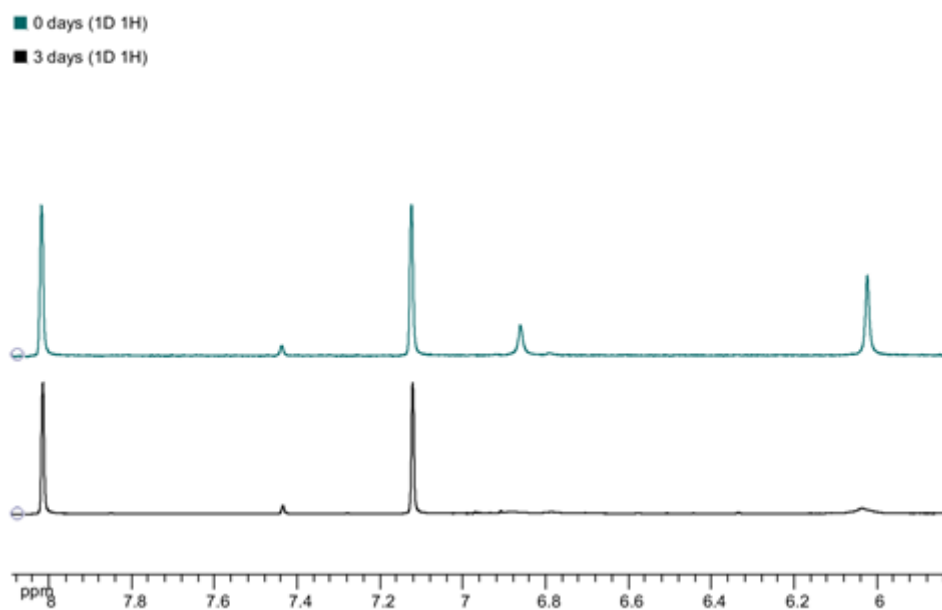

**Figure S2** Stability tests of complex **1** in *d*<sub>6</sub>-DMSO. The blue curve represents the initial <sup>1</sup>H NMR and the black curve is the NMR after 3 days in solution.

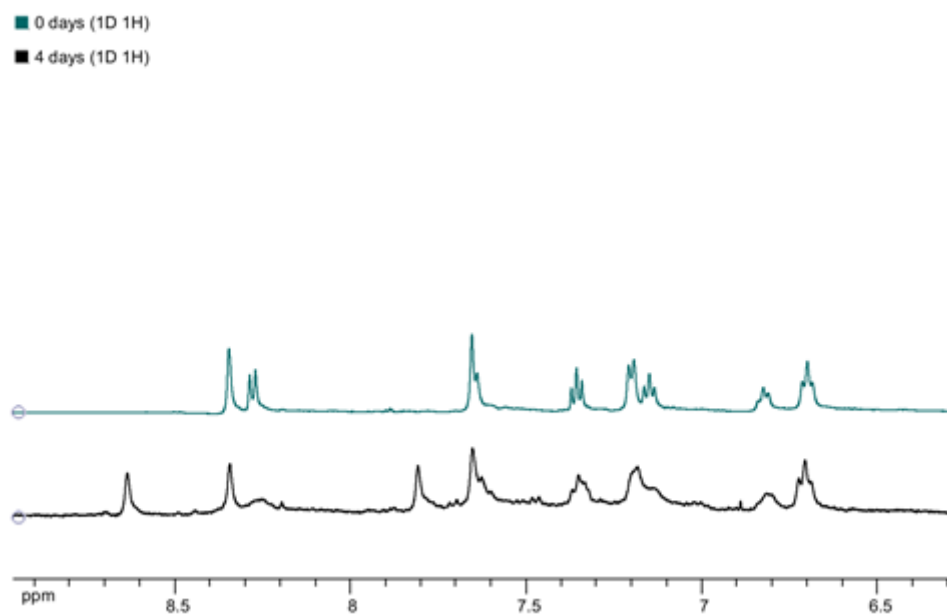

**Figure S3** Stability tests of **3** in *d*<sub>6</sub>-DMSO via <sup>1</sup>H NMR.

## NMR Studies

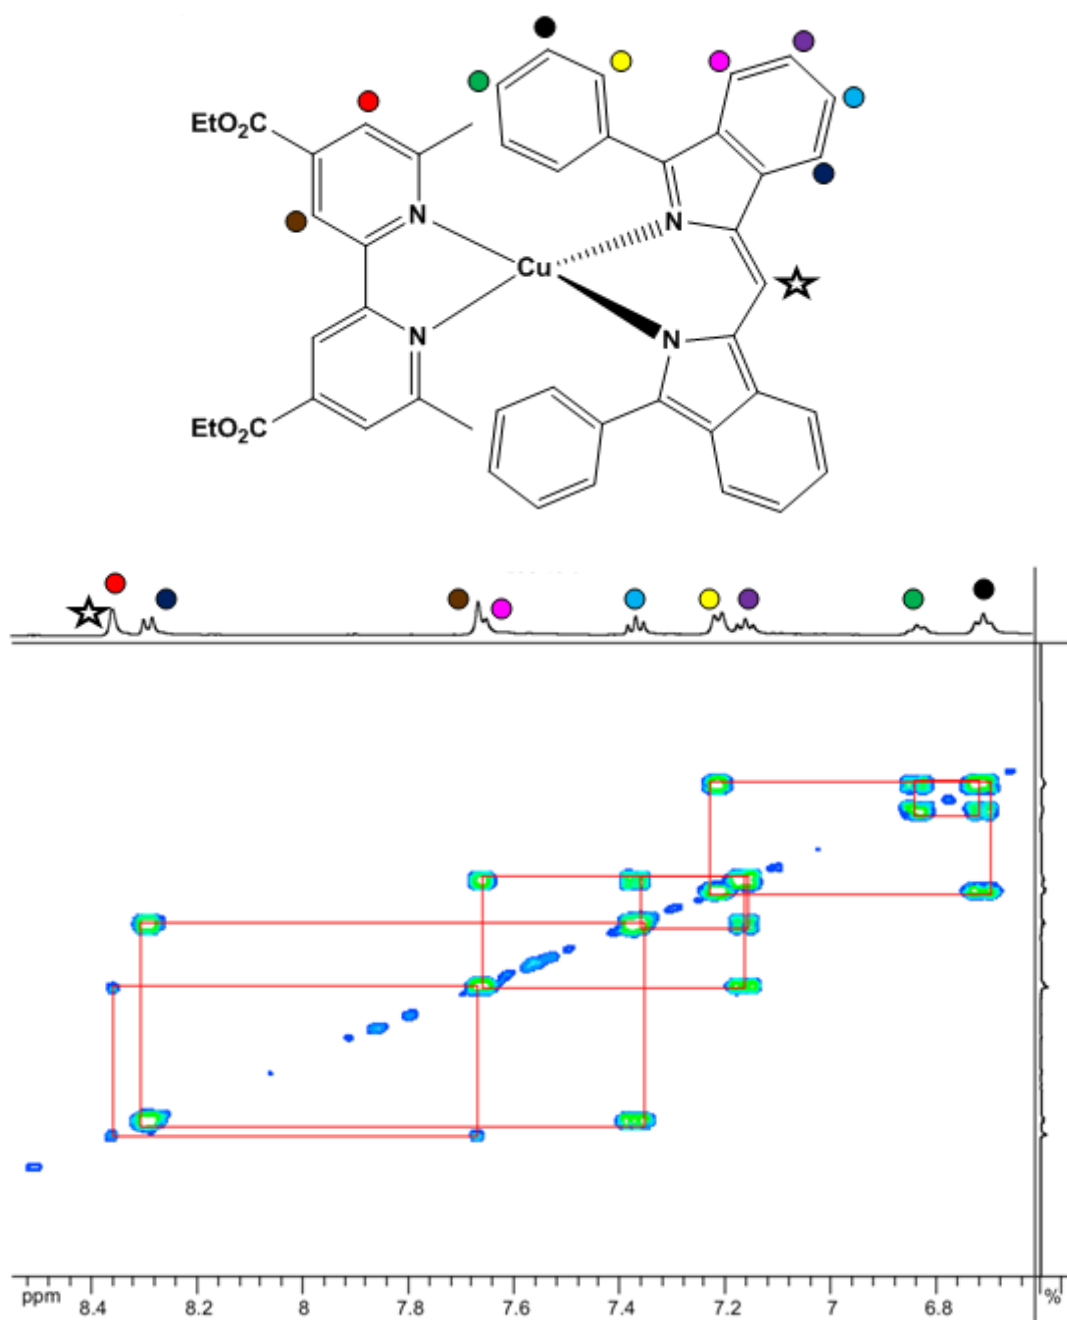

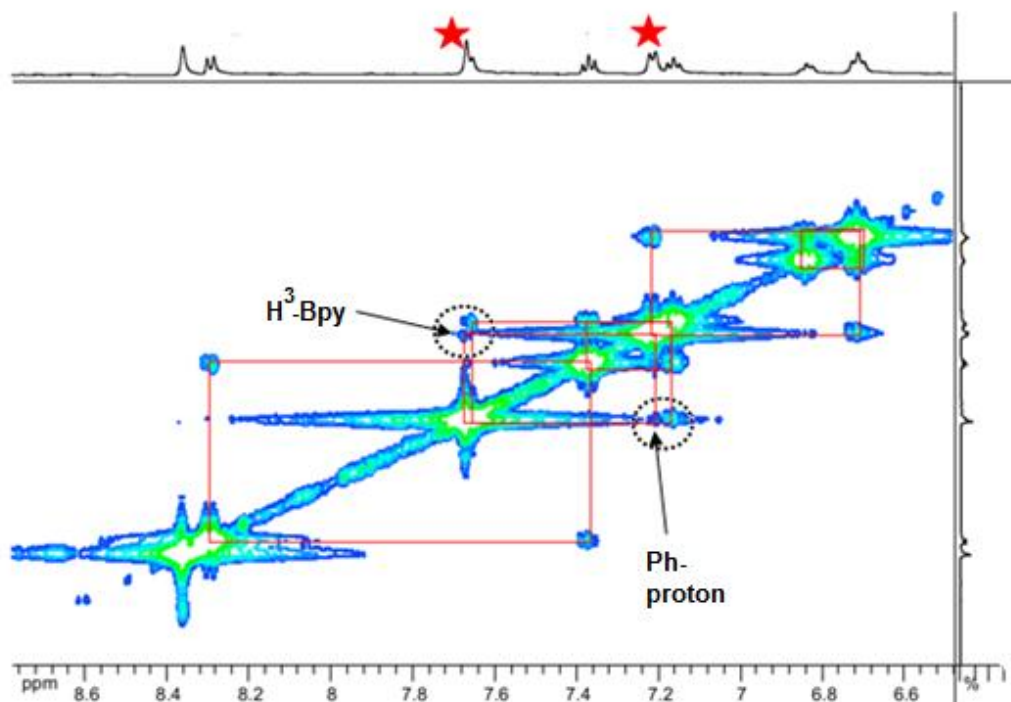

**Figure S4** 2D COSY (top spectrum) and 2D NOESY (bottom spectrum) of **3**. Each peak can be assigned to the protons featured in the structure of the molecule. It is shown that the Ph-proton from the dipyrin ligand correlates through space with H<sup>3</sup>-bpy, suggesting a tetrahedral geometry.

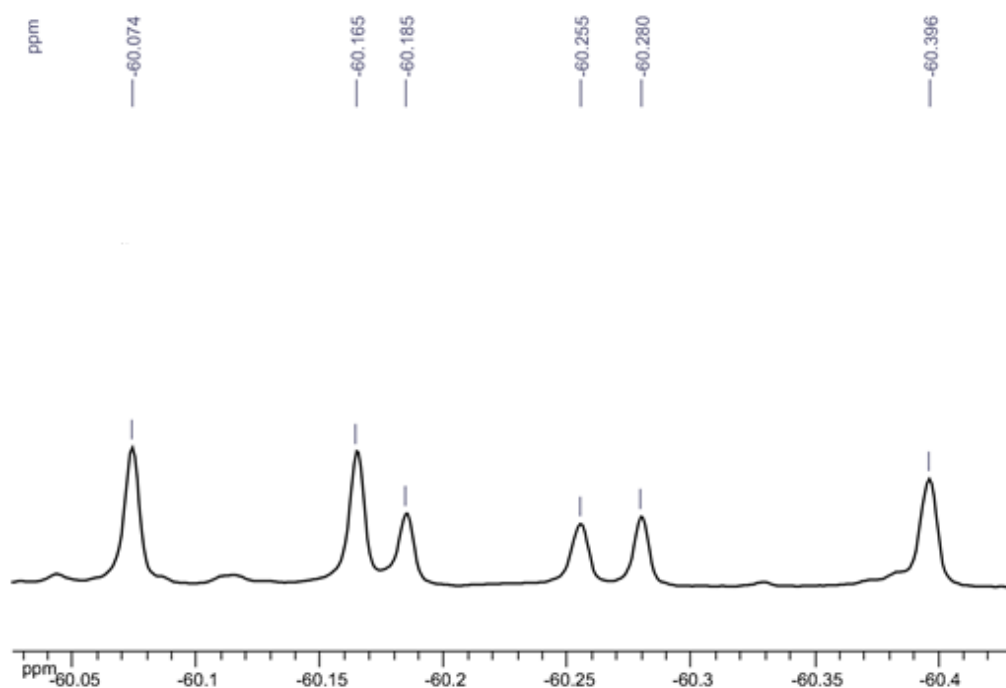

**Figure S5** <sup>19</sup>F NMR of HL3. Multiple peaks suggest presence of geometrical isomers.

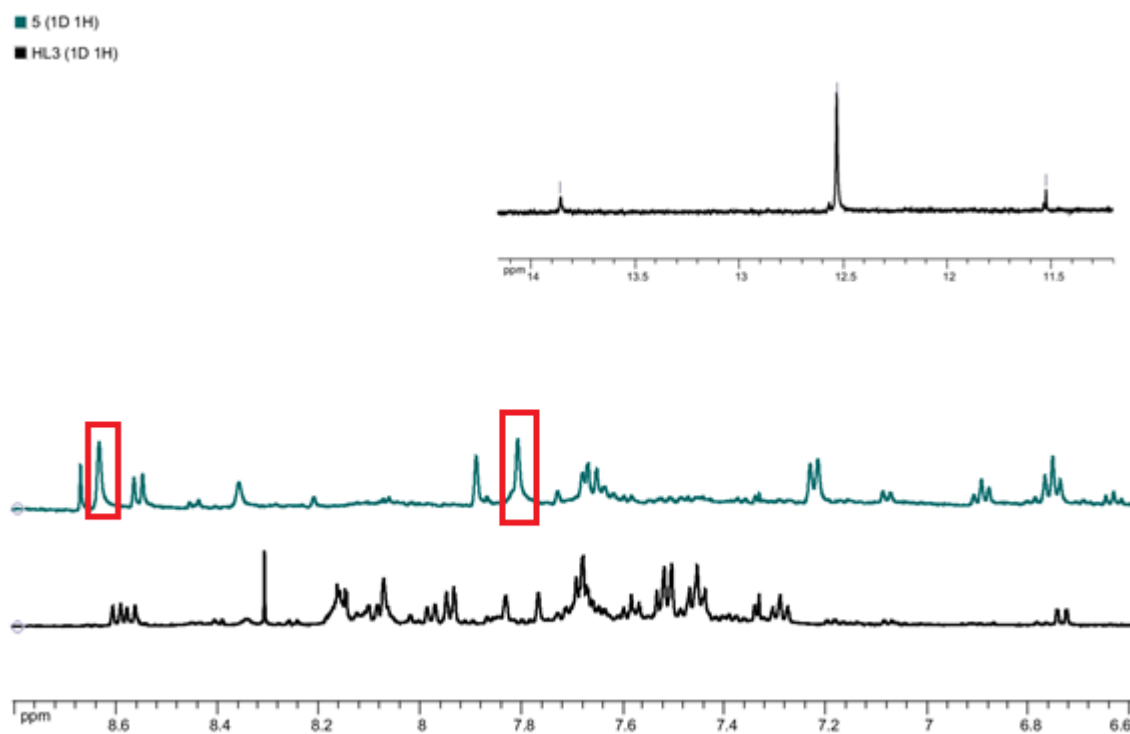

**Figure S6** <sup>1</sup>H NMR of **HL3** (black line) and **5** (green line). The top spectrum shows the three NH peaks (1:5:1) from **HL3** representing the three isomers. The red box shows the presence of free dmdecbpy ligand.

### Absorption Spectroscopy

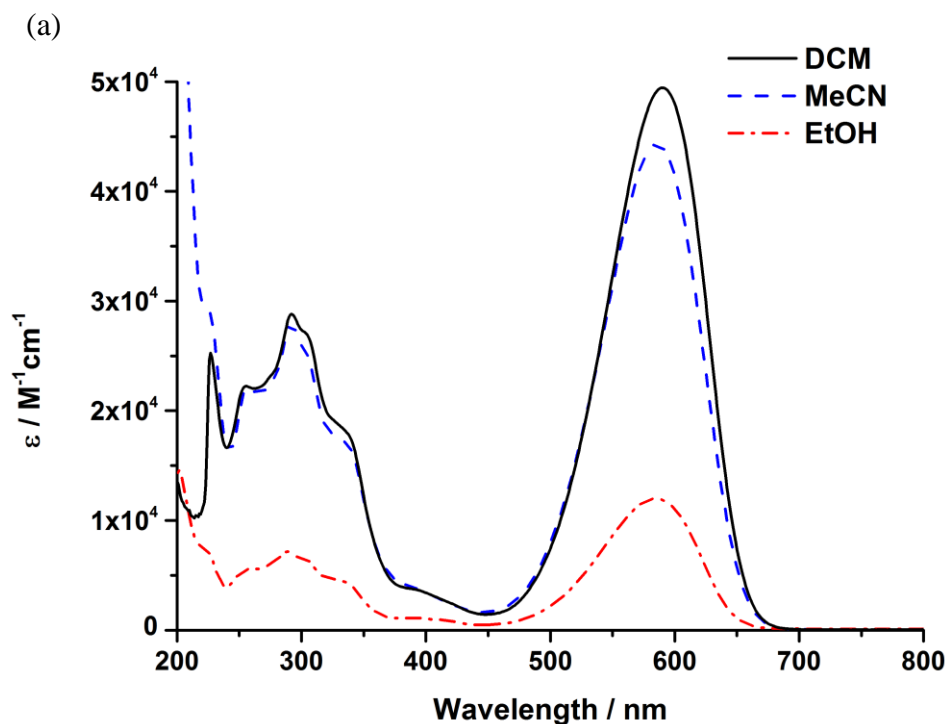

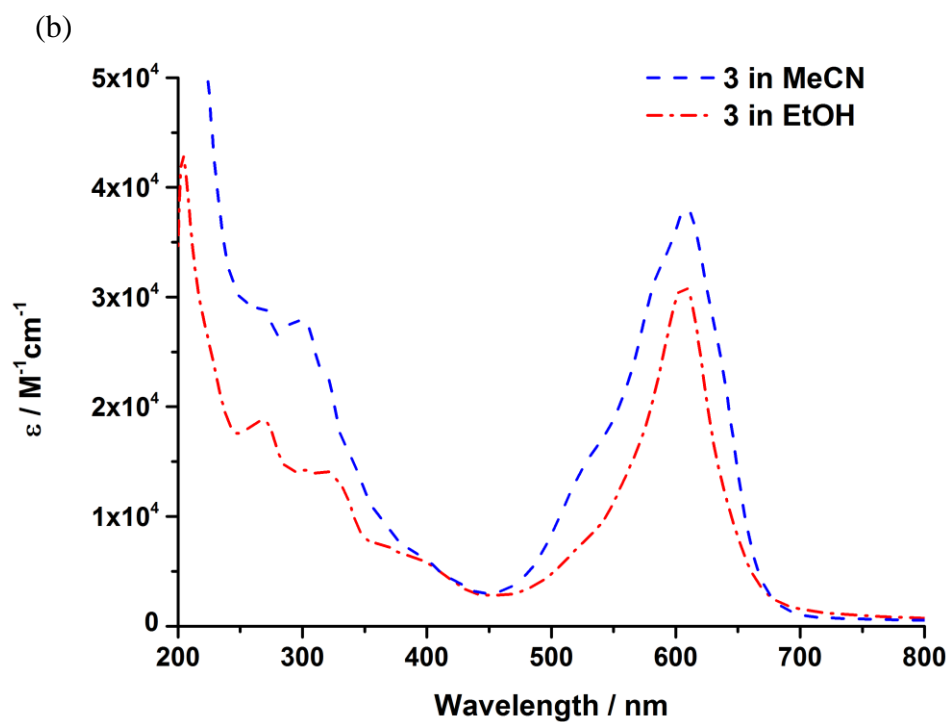

**Figure S7** (a) Absorption spectrum of **HL2** in varying solvents (dichloromethane, acetonitrile, and ethanol), and (b) Absorption spectrum of **3** in acetonitrile and ethanol.

### Emission Spectroscopy

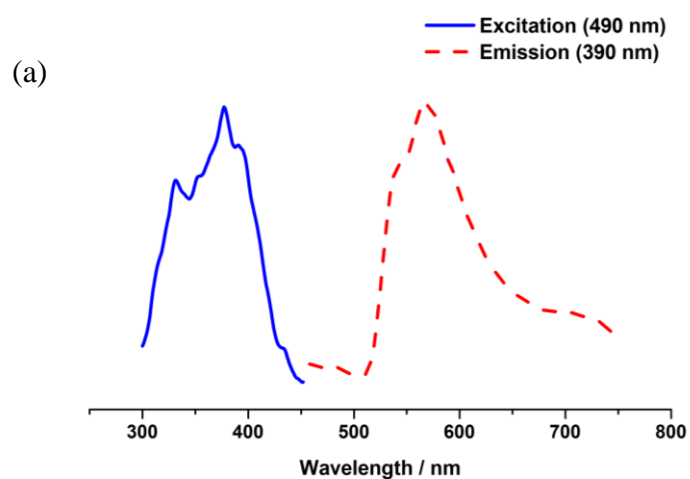



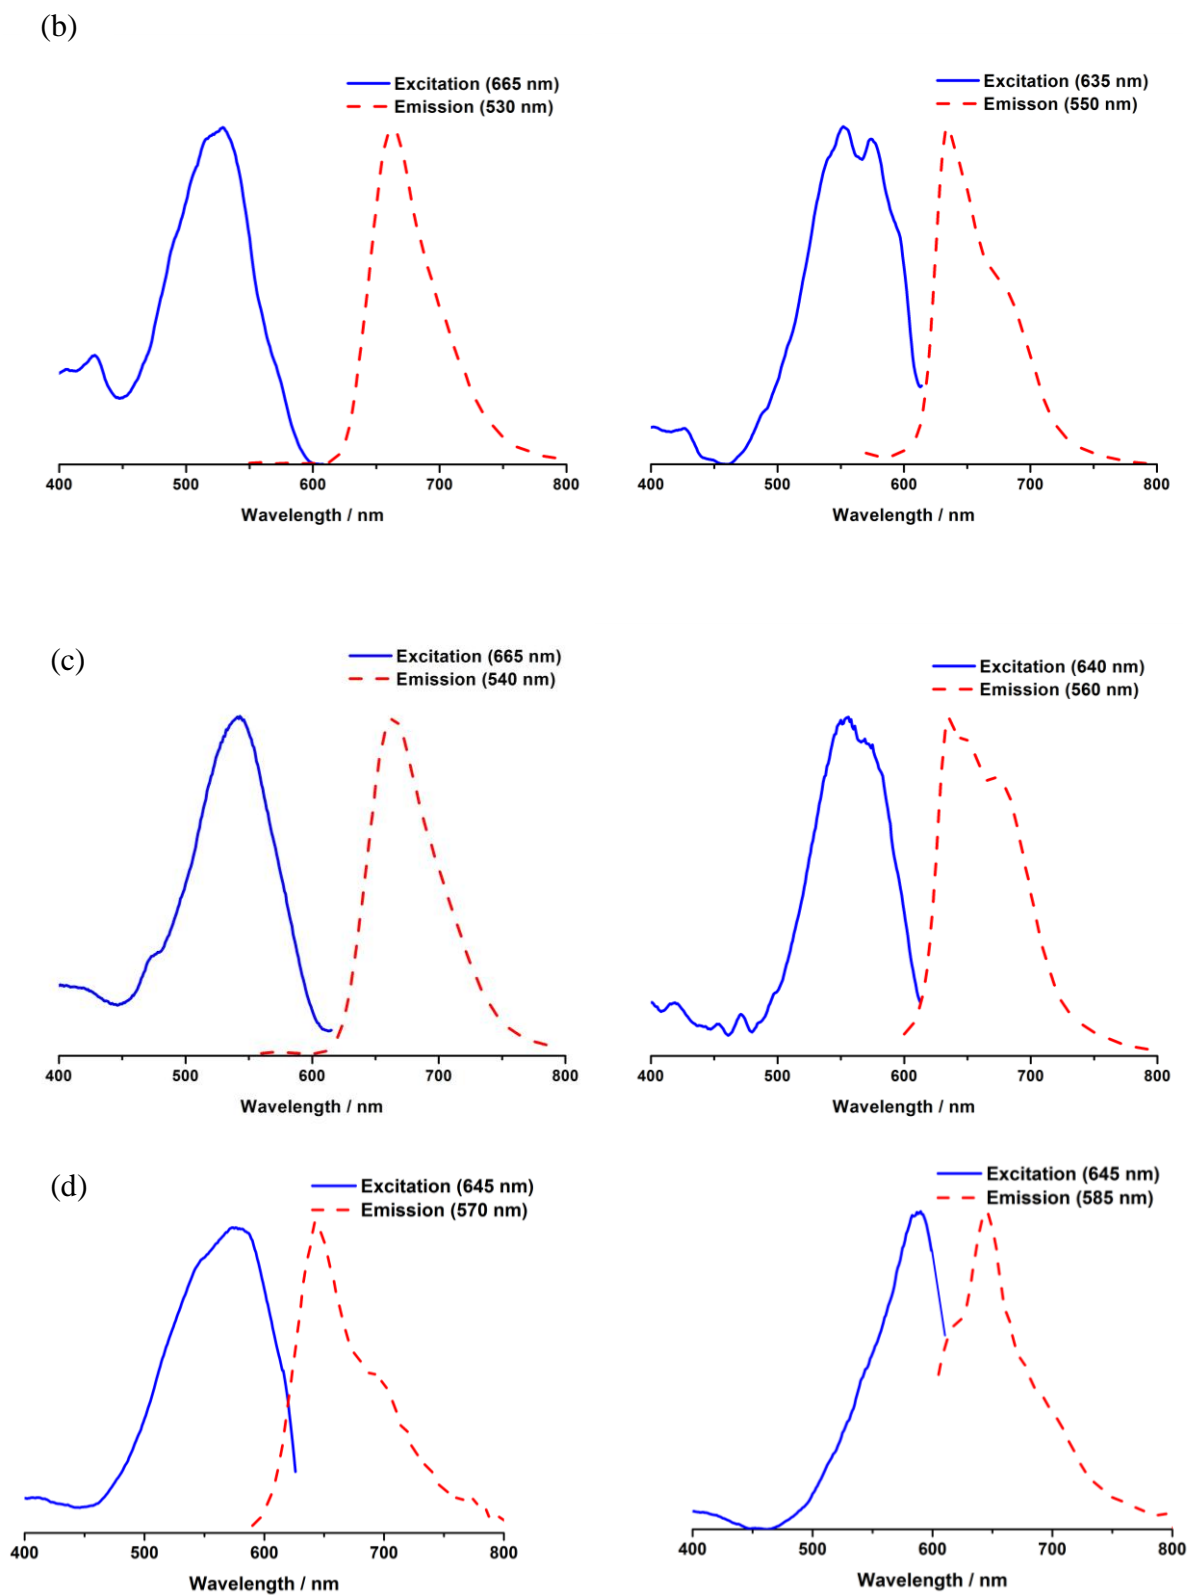

**Figure S8** Represents the excitation and emission spectra at room temperature (left) and 77 K (right) for (a) **1**, (b) **2**, and (c) **3**, all were carried out in ethanol and (d) **4** was carried out in acetonitrile.

## Computational

| Complex  | MO      | MO energy / eV | % Contribution from |                          |                       |
|----------|---------|----------------|---------------------|--------------------------|-----------------------|
|          |         |                | Cu-based orbitals   | Dipyrriin-based orbitals | Me-Bpy based orbitals |
| <b>1</b> | HOMO-10 | -7.74          | 2.74                | 0.54                     | 96.72                 |
|          | HOMO-9  | -7.30          | 0.27                | 99.19                    | 0.54                  |
|          | HOMO-8  | -6.75          | 2.18                | 2.18                     | 95.64                 |
|          | HOMO-4  | -5.46          | 68.14               | 29.68                    | 2.18                  |
|          | HOMO-3  | -5.40          | 81.52               | 9.62                     | 8.86                  |
|          | HOMO-2  | -4.95          | 0.14                | 99.86                    | 0                     |
|          | HOMO-1  | -4.80          | 66.58               | 13.32                    | 20.1                  |
|          | HOMO    | -4.72          | 68.18               | 20.82                    | 11                    |
|          | LUMO    | -1.94          | 3.26                | 2.19                     | 94.55                 |
|          | LUMO+1  | -1.79          | 1.49                | 97.52                    | 0.99                  |
|          | LUMO+2  | -1.01          | 1.76                | 1.36                     | 96.88                 |
|          | LUMO+3  | -0.73          | 0.49                | 0.32                     | 99.19                 |
|          | LUMO+4  | -0.28          | 0.04                | 0.12                     | 99.84                 |
|          | LUMO+8  | -1.52          | 0.54                | 98.89                    | 0.57                  |

**Table S1** Percentage contributions from component parts of **1** to selected molecular orbitals, and the calculated energies for these molecular orbitals.

| Complex  | Main Visible Absorbance / nm | Main Charge Transitions MO from | MO to  | Relative Contribution |
|----------|------------------------------|---------------------------------|--------|-----------------------|
| <b>1</b> | 581                          | HOMO-1                          | LUMO   | 23 %                  |
|          |                              | HOMO-1                          | LUMO+1 | 36 %                  |
|          |                              | HOMO                            | LUMO   | 41 %                  |
|          | 399                          | HOMO-4                          | LUMO+1 | 12 %                  |
|          |                              | HOMO-2                          | LUMO+1 | 88 %                  |
|          | 287                          | HOMO-10                         | LUMO   | 10 %                  |
|          |                              | HOMO-8                          | LUMO   | 64 %                  |
|          |                              | HOMO-8                          | LUMO+2 | 11 %                  |
|          | 237                          | HOMO-1                          | LUMO+4 | 15 %                  |
|          |                              | HOMO-9                          | LUMO+2 | 75 %                  |
| HOMO-2   |                              | LUMO+8                          | 25 %   |                       |
|          |                              |                                 |        |                       |

**Table S2** Percentage contributions from component parts of **1** to selected molecular orbitals, and the calculated energies for these molecular orbitals.

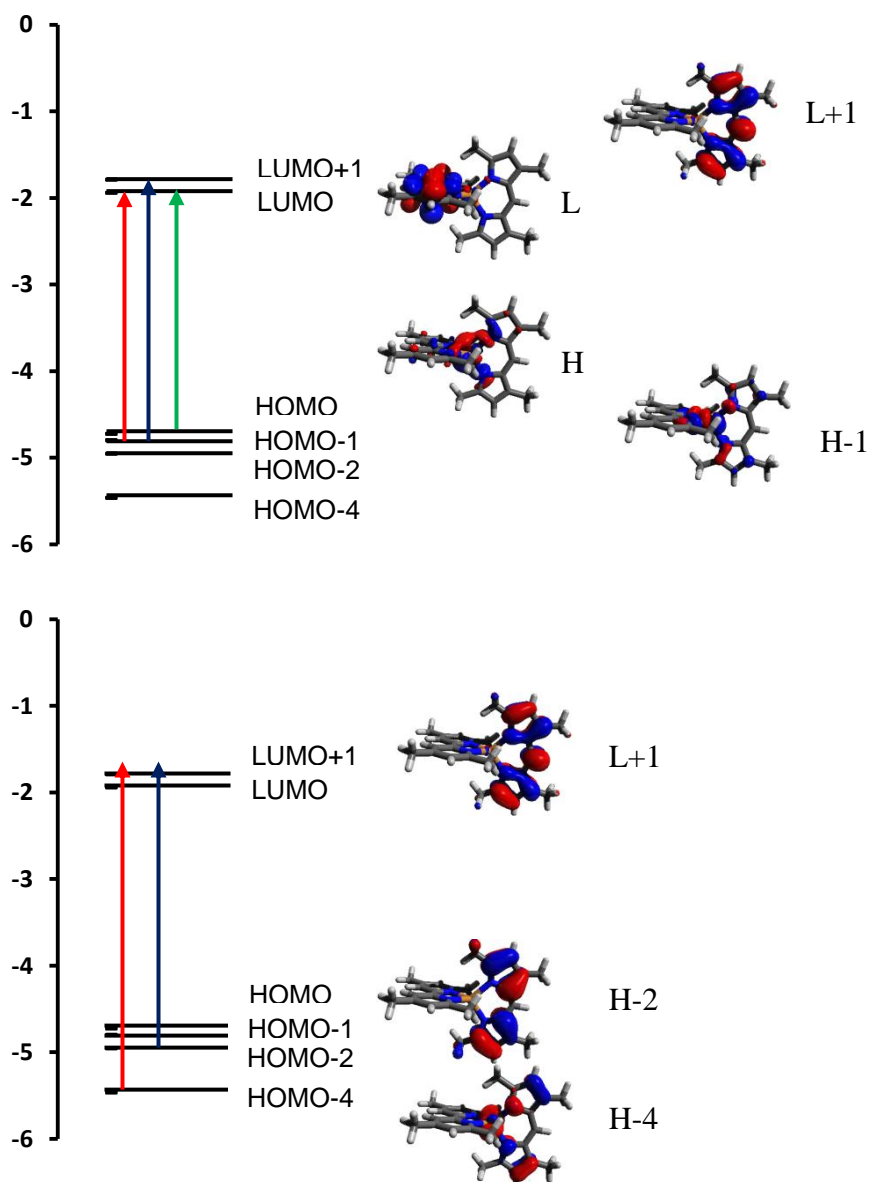

**Figure S9** Molecular orbital diagrams for **1**, showing the main components of the transition for the calculated absorption at 581 nm (top) and 399 nm (bottom).

| Complex  | MO      | MO energy / eV | % Contribution from |                         |                       |
|----------|---------|----------------|---------------------|-------------------------|-----------------------|
|          |         |                | Cu-based orbitals   | Dipyrrin-based orbitals | Me-Bpy based orbitals |
| <b>2</b> | HOMO-10 | -6.98          | 0.08                | 98.28                   | 1.64                  |
|          | HOMO-6  | -6.50          | 2.08                | 96.40                   | 1.52                  |
|          | HOMO-4  | -5.80          | 77.13               | 19.69                   | 3.18                  |
|          | HOMO-2  | -5.19          | 72.11               | 14.63                   | 13.26                 |
|          | HOMO-1  | -4.89          | 66.34               | 16.76                   | 16.90                 |
|          | HOMO    | -4.73          | 0.16                | 99.64                   | 0.20                  |
|          | LUMO    | -2.24          | 2.30                | 96.00                   | 1.70                  |
|          | LUMO+1  | -1.95          | 2.49                | 3.41                    | 94.10                 |
|          | LUMO+2  | -1.09          | 1.34                | 6.14                    | 92.52                 |
|          | LUMO+3  | -0.93          | 0.59                | 97.13                   | 2.28                  |
|          | LUMO+4  | -0.81          | 0.73                | 4.33                    | 94.94                 |
|          | LUMO+7  | -0.40          | 0.64                | 97.18                   | 2.18                  |
|          | LUMO+9  | -0.34          | 6.10                | 88.92                   | 4.98                  |

**Table S3** Percentage contributions from component parts of **2** to selected molecular orbitals, and the calculated energies for these molecular orbitals.

| Complex  | Main Visible Absorbance / nm | Main Charge Transitions MO from | MO to  | Relative Contribution |
|----------|------------------------------|---------------------------------|--------|-----------------------|
| <b>2</b> | 671                          | HOMO-2                          | LUMO   | 24 %                  |
|          |                              | HOMO-1                          | LUMO   | 62 %                  |
|          |                              | HOMO-1                          | LUMO+1 | 14 %                  |
|          | 541                          | HOMO                            | LUMO   | 66 %                  |
|          |                              | HOMO                            | LUMO+1 | 34 %                  |
|          | 375                          | HOMO-6                          | LUMO   | 12 %                  |
|          |                              | HOMO-2                          | LUMO+2 | 16 %                  |
|          |                              | HOMO                            | LUMO+3 | 72 %                  |
|          | 291                          | HOMO-10                         | LUMO   | 39 %                  |
|          |                              | HOMO-4                          | LUMO+3 | 11 %                  |
|          |                              | HOMO-4                          | LUMO+4 | 11 %                  |
|          |                              | HOMO-2                          | LUMO+7 | 13 %                  |
|          |                              | HOMO-2                          | LUMO+9 | 26 %                  |

**Table S4** TD-DFT calculated visible absorption wavelengths for **2**, indicating the molecular orbitals involved and their relative contribution to the absorption.

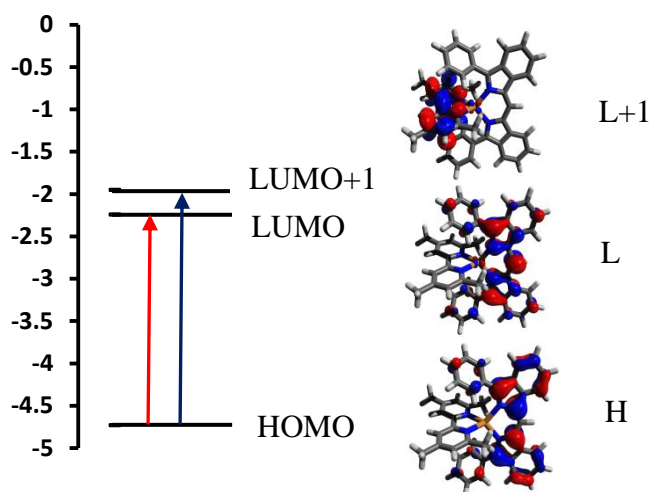

**Figure S10** Molecular orbital diagram for **2**, showing the main charge transitions for the calculated absorption at 541 nm.

| Complex  | MO      | MO energy / eV | % Contribution from |                          |                                       |
|----------|---------|----------------|---------------------|--------------------------|---------------------------------------|
|          |         |                | Cu-based orbitals   | Dipyrroin-based orbitals | CO <sub>2</sub> Et-Bpy based orbitals |
| <b>3</b> | HOMO-13 | -7.16          | 1.73                | 33.39                    | 64.88                                 |
|          | HOMO-9  | -7.02          | 0.14                | 98.84                    | 1.02                                  |
|          | HOMO-8  | -6.85          | 34.17               | 58.75                    | 7.08                                  |
|          | HOMO-7  | -6.78          | 6.86                | 89.82                    | 3.32                                  |
|          | HOMO-6  | -6.56          | 2.43                | 96.19                    | 1.38                                  |
|          | HOMO-3  | -5.98          | 76.61               | 13.95                    | 9.44                                  |
|          | HOMO-2  | -5.56          | 69.26               | 16.82                    | 13.92                                 |
|          | HOMO-1  | -5.19          | 63.58               | 19.17                    | 17.25                                 |
|          | HOMO    | -4.78          | 0.12                | 99.70                    | 0.18                                  |
|          | LUMO    | -2.74          | 4.99                | 5.73                     | 89.28                                 |
|          | LUMO+1  | -2.31          | 2.06                | 95.82                    | 2.12                                  |
|          | LUMO+2  | -2.29          | 0.53                | 3.60                     | 95.87                                 |
|          | LUMO+4  | -0.97          | 0.67                | 98.75                    | 0.58                                  |
|          | LUMO+5  | -0.63          | 1.79                | 96.63                    | 1.58                                  |
|          | LUMO+6  | -0.46          | 0.32                | 97.56                    | 2.12                                  |
|          | LUMO+9  | -0.40          | 3.68                | 92.26                    | 4.06                                  |

**Table S5** Percentage contributions from component parts of **3** to selected molecular orbitals, and the calculated energies for these molecular orbitals.

| Complex | Main Visible Absorbance / nm | Main Charge Transitions MO from | MO to  | Relative Contribution |      |
|---------|------------------------------|---------------------------------|--------|-----------------------|------|
| 3       | 744                          | HOMO-2                          | LUMO   | 42 %                  |      |
|         |                              | HOMO-1                          | LUMO   | 58 %                  |      |
|         | 546                          | HOMO-3                          | LUMO   | 13 %                  |      |
|         |                              | HOMO-1                          | LUMO+2 | 60 %                  |      |
|         | 538                          | HOMO                            | LUMO+1 | 27 %                  |      |
|         |                              | HOMO-3                          | LUMO   | 28 %                  |      |
|         |                              | HOMO-1                          | LUMO+2 | 18 %                  |      |
|         |                              | HOMO                            | LUMO+1 | 54 %                  |      |
|         | 318                          | HOMO-13                         | LUMO   | 27 %                  |      |
|         |                              | HOMO-8                          | LUMO+1 | 24 %                  |      |
|         |                              | HOMO-6                          | LUMO+2 | 8 %                   |      |
|         |                              | HOMO-2                          | LUMO+4 | 20 %                  |      |
|         |                              | HOMO                            | LUMO+9 | 21 %                  |      |
|         |                              | 316                             | HOMO-9 | LUMO+1                | 9 %  |
|         |                              |                                 | HOMO-7 | LUMO+1                | 32 % |
|         |                              |                                 | HOMO-6 | LUMO+1                | 30 % |
|         |                              |                                 | HOMO-1 | LUMO+5                | 13 % |
| HOMO    | LUMO+4                       |                                 | 9 %    |                       |      |
| HOMO    | LUMO+6                       |                                 | 7 %    |                       |      |

**Table S6** TD-DFT calculated visible absorption wavelengths for **3**, indicating the molecular orbitals involved and their relative contribution to the absorption.

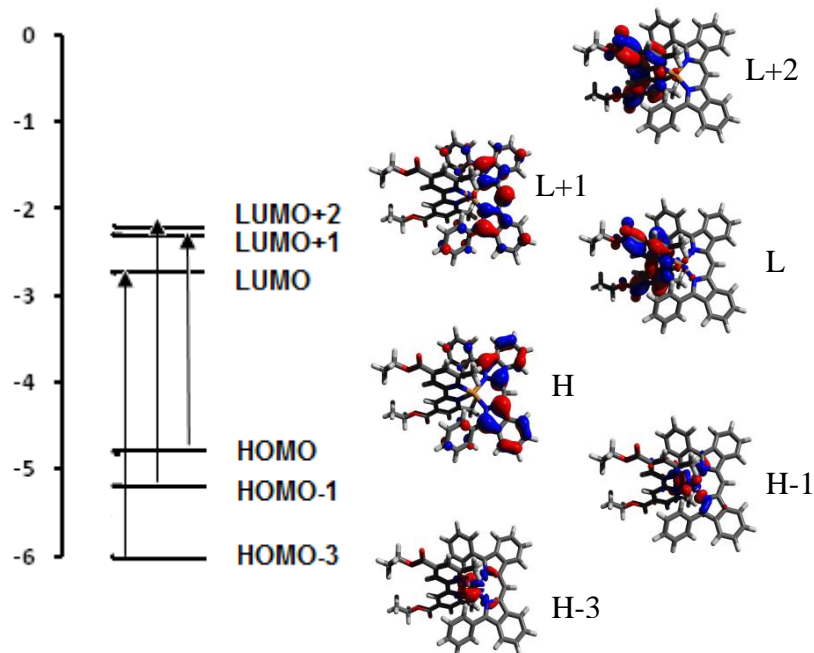

**Figure S11** Molecular orbital diagram for **3**, showing the main charge transitions for the calculated absorption at 546 nm.

## Solar Studies

| Sample | Bipy used | Copper source                                            | Solvent | Reducing agent or base |
|--------|-----------|----------------------------------------------------------|---------|------------------------|
| 1      | Dmdcbpy   | [Cu(CH <sub>3</sub> CN) <sub>4</sub> ][BF <sub>4</sub> ] | DCM     | -                      |
| 2      | Dmdcbpy   | [Cu(CH <sub>3</sub> CN) <sub>4</sub> ][BF <sub>4</sub> ] | MeCN    | -                      |
| 3      | Tcbpy     | [Cu(CH <sub>3</sub> CN) <sub>4</sub> ][BF <sub>4</sub> ] | MeCN    | -                      |
| 4      | Dmdcbpy   | Cu(L1) <sub>2</sub>                                      | MeOH    | Methanol               |
| 5      | Dmdcbpy   | Cu(L1) <sub>2</sub>                                      | MeOH    | Zn/Hg                  |
| 6      | Dmdcbpy   | Cu(L1) <sub>2</sub>                                      | DCM     | NaBH <sub>4</sub>      |
| 7      | Dmdcbpy   | [Cu(CH <sub>3</sub> CN) <sub>4</sub> ][BF <sub>4</sub> ] | DCM     | NaOH                   |
| 8      | Dmdcbpy   | [Cu(CH <sub>3</sub> CN) <sub>4</sub> ][BF <sub>4</sub> ] | DCM     | -                      |
| 9      | Dmdcbpy   | [Cu(CH <sub>3</sub> CN) <sub>4</sub> ][BF <sub>4</sub> ] | MeCN    | -                      |
| 10     | Dmdcbpy   | Cu(L2) <sub>2</sub>                                      | MeOH    | -                      |
| 11     | Dmdcbpy   | [Cu(CH <sub>3</sub> CN) <sub>4</sub> ][BF <sub>4</sub> ] | MeCN    | -                      |

**Table S7** Reagents and solvents used in each test. Bipy is adsorbed first followed by Cu and dipyrin.

| Sample | V <sub>oc</sub> /<br>mV | J <sub>sc</sub> /<br>mAcm <sup>-2</sup> | V <sub>MP</sub> /<br>mV | J <sub>MP</sub> /<br>mAcm <sup>-2</sup> | FF   | η / % | Average η /<br>% |
|--------|-------------------------|-----------------------------------------|-------------------------|-----------------------------------------|------|-------|------------------|
| REF    | 530                     | 2.33                                    | 400                     | 2.06                                    | 0.68 | 0.83  | 0.80 ± 0.03      |
| 1      | 520                     | 0.40                                    | 420                     | 0.30                                    | 0.62 | 0.13  | 0.10 ± 0.03      |
| 2      | 410                     | 0.50                                    | 300                     | 0.36                                    | 0.52 | 0.11  | 0.10 ± 0.01      |
| 3      | 410                     | 0.26                                    | 300                     | 0.19                                    | 0.56 | 0.06  | 0.05 ± 0.01      |
| 4      | 210                     | 0.12                                    | 120                     | 0.08                                    | 0.36 | 0.009 | 0.007 ± 0.02     |
| 8      | 280                     | 0.03                                    | 170                     | 0.02                                    | 0.39 | 0.003 | 0.002 ± 0.001    |
| 9      | 510                     | 0.91                                    | 400                     | 0.77                                    | 0.68 | 0.31  | 0.28 ± 0.03      |
| 10     | 420                     | 0.46                                    | 320                     | 0.35                                    | 0.56 | 0.11  | 0.09 ± 0.02      |
| 11     | 520                     | 1.21                                    | 420                     | 0.98                                    | 0.64 | 0.41  | 0.39 ± 0.02      |

**Table S8** JV data collected at AM1.5. The unmasked area was 0.16 cm<sup>2</sup>. Two cells per sample were tested and the average efficiency was recorded. The reported efficiency is the data of the best cell.

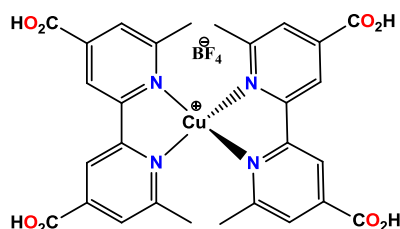

**Cu(dmdcbpy)<sub>2</sub>BF<sub>4</sub> (REF)**

## Cyclic Voltammetry

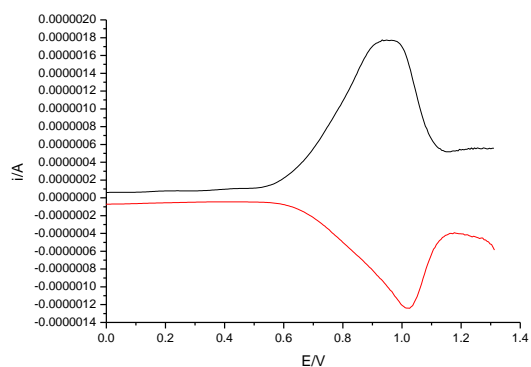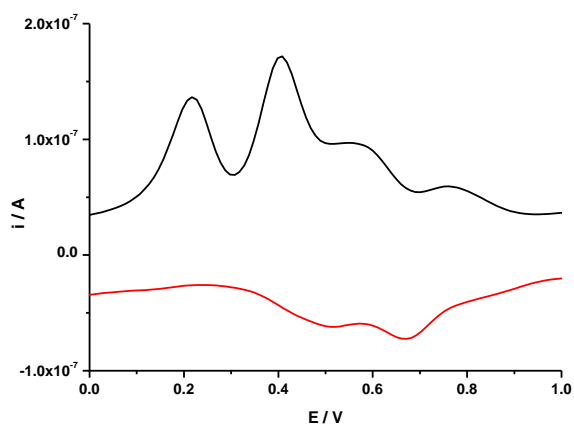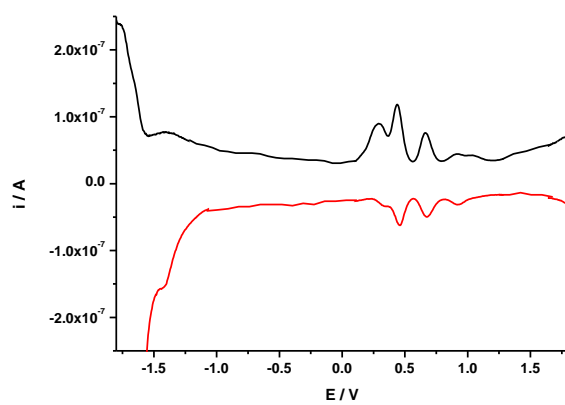



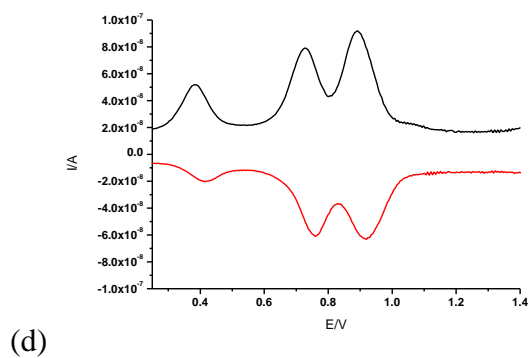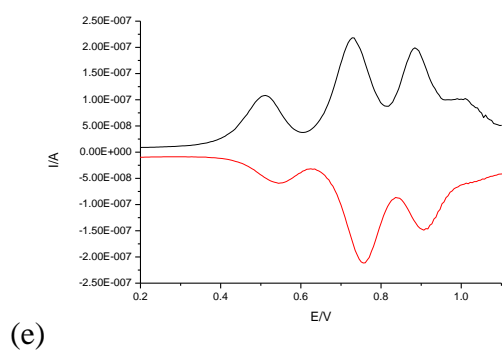

**Figure S12** Oxidative differential pulse voltammetry of Cu(I) complexes against Ag/AgCl. Upper black scan is forward to more positive potential and the lower red line is the return scan. (a) **1** (b) **2** (c) **3** (d) **4** (e) **5**
